# Supplementary material for: Extent of axial damage in psoriatic arthritis and spondyloarthritis: comparative data from the BEPAS and (Be-)GIANT multicentre cohorts
Source: HighWire-hosted journal article supplement (doi:10.1136/rmdopen-2023-002994), 2023-05-01
Supplement: rmdopen-2023-002994supp001_data_supplement.pdf [file rmdopen-2023-002994supp001_data_supplement.pdf]

## Supplementary table

Table 1. Baseline characteristics of 149 BEPAS patients excluded from study cohort due to missing radiographic data.

|                                       | <b>BEPAS patients excluded from current study (n=149)</b> | <b>BEPAS patients in current study cohort* (n=312)</b> | P-value <sup>□</sup> |
|---------------------------------------|-----------------------------------------------------------|--------------------------------------------------------|----------------------|
| Age at start study, years (mean±SD)   | 52.4±12.0                                                 | 53.7±12.5                                              | 0.921                |
| Age at disease onset, years (mean±SD) | 41.4±12.7                                                 | 41.3±15.3                                              | 0.945                |
| Disease duration, years (mean±SD)     | 8.4±8.6                                                   | 8.3±9.7                                                | 0.915                |
| Female sex, n (%)                     | 59 (39.6%)                                                | 140 (44.9%)                                            | 0.260                |
| HLA-B27 positive <sup>○</sup> , n (%) | 3/25 (12.0%)                                              | 24/136 (17.6%)                                         | 0.065                |
| IBP <sup>◆</sup> , n (%)              | 12 (8.1%)                                                 | 58 (18.6%)                                             | 0.003                |
| Positive family history, n (%)        | 69 (46.3%)                                                | 157 (50.3%)                                            | 0.612                |
| Psoriasis <40 years, n (%)            | 94 (62.3%)                                                | 193 (61.9%)                                            | 0.396                |
| Peripheral arthritis, n (%)           | 86 (57.0%)                                                | 102 (32.7%)                                            | <0.0001              |
| Dactylitis, n (%)                     | 18 (11.9%)                                                | 45 (14.4%)                                             | 0.605                |
| Heel enthesitis, n (%)                | 29 (19.2%)                                                | 82 (26.3%)                                             | 0.102                |
| Uveitis, n (%)                        | 7 (5.3%)                                                  | 15 (4.8%)                                              | 0.930                |
| IBD, n (%)                            | 2 (1.3%)                                                  | 2 (0.6%)                                               | 0.458                |
| Good response to NSAIDs, n (%)        | 74 (49.0%)                                                | 142 (45.5%)                                            | 0.241                |
| Elevated ESR/CRP, n (%)               | 25 (16.6%)                                                | 50 (16.0%)                                             | 0.861                |
| CRP, mg/L (mean±SD)                   | 5.3±8.0                                                   | 6.1±11.0                                               | 0.428                |

\* Patients included in the BEPAS cohort with radiographic imaging available. Data in this column I equal to that in table 1

□ Between PsA and all (axial and peripheral) SpA patients

○ HLA-B27; Human Leukocyte Antigen B27 typing was missing in 126 of the excluded patients and in 176 of the patients in current BEPAS study cohort.

◆ IBP; inflammatory back pain according to ASAS definition
